# Supplementary material for: Viral-inducible Argonaute18 confers broad-spectrum virus resistance in rice by sequestering a host microRNA
Source: eLife. 2015 Feb 17;4:e05733. doi: 10.7554/eLife.05733 (PMC4358150; doi:10.7554/eLife.05733)
Supplement: Supplementary file 1. — (A) Disease incidence of RSV- or RDV-inoculated rice plants. (B) Summary of small RNA deep sequencing datasets. (C) Analysis of miRNA abundance by deep sequencing. (D) Oligonucleotides used in this study. DOI: http://dx.doi.org/10.7554/eLife.05733.015 [file elife05733s001.xlsx]

## Sheet: Supplementary file 1A
Supplementary file 1A.Disease incidence of RSV- or RDV-inoculated rice plants.
Virus-infected	Rice plants	Reactions of test plants
		No. of inoculated plants	No. of diseased plants	Disease incidence
	WT	97	47	0.485
	ago18	83	70	0.843
	YF/AA	42	35	0.833
	D833A	36	24	0.667
	AGO18	32	14	0.438
RSV-infected	AGO18OE-1#	56	12	0.214
	AGO18OE-2#	67	17	0.254
	AGO18OE-5#	59	19	0.322
	Wuyujing 3 (susceptible cv.)	34	24	0.706
	WT	120	56	0.466667
	ago18	90	84	0.933333
RDV-infected	AGO18OE-1#	86	15	0.174419
	AGO18OE-2#	96	20	0.208333
	AGO18OE-5#	95	25	0.263158
	Xiu136-12 (susceptible cv.)	100	91	0.91

## Sheet: Supplementary file 1B
Supplementary file 1B.Summary of small RNAs deep-sequencing results of small RNA libraries constructed from virus-infected, mock-inoculated and AGOs-IP virus-infected rice
Library name	Total reads	Mapped to rice genomea	Mapped to viral genomeb	Ratio of vsiRNAsc
Total/Mock-1	5430579	4057794	2013
Total/Mock-2	4069782	3137863	3730	0.000724667
Total/Mock-3	3467022	2746405	1349
Total/RSV-1	6326816	4796697	117780
Total/RSV-2	4541299	3488969	193876	0.044781
Total/RSV-3	4742844	3631024	222477
AGO1a IP/RSV-1	1616908	425938	88575	0.173683
AGO1a IP/RSV-2	2248385	788987	167607
AGO1b IP/RSV-1	2157959	923260	205142	0.0976585
AGO1b IP/RSV-2	1264942	401583	5503
AGO18 IP/RSV-1	2307302	1045390	26618	0.0252025
AGO18 IP/RSV-2	2448088	986560	25893
aNumber of reads with perfect match to the rice genome
bNumber of reads with up to 3 mismatches to the viral genome
cAverage vsiRNA ratio

## Sheet: Supplementary file 1C
Supplementary file 1C.Analysis of miRNA abundance by deep sequencing.
miR ID	Total/Mock	Total/RSV	AGO1a IP/RSV	AGO1b IP/RSV	AG018 IP/RSV
	RPMa	RPMa	RPMa	RPMa	RPMa
miR528	653.476	220.897	7846.95	2220.11	19077.8
miR168a	37708.7	53093.9	976.661	1749.5	4784.33
miR159a	11569	1390.58	3807.26	9134.01	5141.14
miR159b	11569	1390.58	3807.26	9134.01	5141.14
miR396d	13150.2	1778.71	608.414	4851.95	2573.2
miR396e	13150.2	1778.71	608.414	4851.95	2573.2
miR396f	13150.2	1778.71	608.414	4851.95	2573.2
miR397a.2	587.214	187.673	1075.42	870.567	2142.3
miR397b.2	587.214	187.673	1075.42	870.567	2142.3
miR166a	1716.31	768.035	254.575	778.224	381.43
miR166b	1716.31	768.035	254.575	778.224	381.43
miR166c	1716.31	768.035	254.575	778.224	381.43
miR166d	1716.31	768.035	254.575	778.224	381.43
miR166f	1716.31	768.035	254.575	778.224	381.43
miR166n	1716.31	768.035	254.575	778.224	381.43
miR396c	1427.91	382.229	335.904	540.565	482.19
miR398b	19.0417	28.6623	123.612	115.401	417.32
miR444b.2	209.608	220.357	62.0224	22.0254	166.191
miR444c.2	209.608	220.357	62.0224	22.0254	166.191
miR393b-3p	1427.73	257.911	9.25982	56.3877	140.883
miR169b	495.404	120.886	9.78092	50.3497	189.966
miR169c	495.404	120.886	9.78092	50.3497	189.966
miR1850.1	32.4492	55.1659	10.198	9.28186	98.9481
miR1863	355.176	163.898	18.9854	26.0058	111.728
miR1868.2	308.111	53.4741	289.797	201.271	118.534
miR156a	5749.81	1714.68	87.2821	57.9663	90.3002
miR156b	5749.81	1714.68	87.2821	57.9663	90.3002
miR156c	5749.81	1714.68	87.2821	57.9663	90.3002
miR156d	5749.81	1714.68	87.2821	57.9663	90.3002
miR156e	5749.81	1714.68	87.2821	57.9663	90.3002
miR156f	5749.81	1714.68	87.2821	57.9663	90.3002
miR156g	5749.81	1714.68	87.2821	57.9663	90.3002
miR156h	5749.81	1714.68	87.2821	57.9663	90.3002
miR156i	5749.81	1714.68	87.2821	57.9663	90.3002
miR156j	5749.81	1714.68	87.2821	57.9663	90.3002
miR1884b	223.683	51.8237	58.9616	40.2488	185.627
miR166g	182.5	108.571	87.7191	121.266	88.2377
miR166h	182.5	108.571	87.7191	121.266	88.2377
miR535	477.563	1001.1	6.10831	2.18075	83.6246
miR172a	415.288	373.208	889.855	527.787	46.5056
miR172d	415.288	373.208	889.855	527.787	46.5056
miR444b.1	99.9674	43.2757	76.2327	17.7185	61.3149
miR444c.1	99.9674	43.2757	76.2327	17.7185	61.3149
miR395b	43.6811	22.8161	8.41897	31.8672	64.7121
miR395d	43.6811	22.8161	8.41897	31.8672	64.7121
miR395e	43.6811	22.8161	8.41897	31.8672	64.7121
miR395g	43.6811	22.8161	8.41897	31.8672	64.7121
miR395h	43.6811	22.8161	8.41897	31.8672	64.7121
miR395i	43.6811	22.8161	8.41897	31.8672	64.7121
miR395j	43.6811	22.8161	8.41897	31.8672	64.7121
miR395k	43.6811	22.8161	8.41897	31.8672	64.7121
miR395l	43.6811	22.8161	8.41897	31.8672	64.7121
miR395m	43.6811	22.8161	8.41897	31.8672	64.7121
miR395n	43.6811	22.8161	8.41897	31.8672	64.7121
miR395p	43.6811	22.8161	8.41897	31.8672	64.7121
miR395q	43.6811	22.8161	8.41897	31.8672	64.7121
miR395r	43.6811	22.8161	8.41897	31.8672	64.7121
miR395s	43.6811	22.8161	8.41897	31.8672	64.7121
miR164a	552.547	152.323	1555.14	539.66	98.9859
miR164b	552.547	152.323	1555.14	539.66	98.9859
miR164f	552.547	152.323	1555.14	539.66	98.9859
miR167a	1065.14	205.24	1058.22	817.625	57.3098
miR167b	1065.14	205.24	1058.22	817.625	57.3098
miR167c	1065.14	205.24	1058.22	817.625	57.3098
miR530-3p	4.83571	4.75042	108.435	100.558	39.8252
miR162a	245.624	112.621	119.995	64.3734	38.1836
miR396a	10.2314	6.02528	153.333	91.6852	36.8584
miR396b	10.2314	6.02528	153.333	91.6852	36.8584
miR171b	110.366	295.133	102.597	18.5226	25.9468
miR171c	110.366	295.133	102.597	18.5226	25.9468
miR171d	110.366	295.133	102.597	18.5226	25.9468
miR171e	110.366	295.133	102.597	18.5226	25.9468
miR171f	110.366	295.133	102.597	18.5226	25.9468
miR1867.1	117.536	47.7111	4.30159	3.82998	49.7049
miR168a-3p.1	81.906	318.218	11.8902	6.02421	36.9427
miR167d	220.355	233.244	759.521	363.741	23.8094
miR167e	220.355	233.244	759.521	363.741	23.8094
miR167f	220.355	233.244	759.521	363.741	23.8094
miR167g	220.355	233.244	759.521	363.741	23.8094
miR167h	220.355	233.244	759.521	363.741	23.8094
miR167i	220.355	233.244	759.521	363.741	23.8094
miR167j	220.355	233.244	759.521	363.741	23.8094
miR435	62.8357	22.1147	0.531614	40.1545	28.6985
miR437-3p.2	93.7071	27.0486	5.21878	3.27113	28.2152
miR1871	100.544	18.4699	24.753	23.648	36.3222
miR169a	51.8427	25.6857	90.6759	40.2889	33.6423
miR408	32.2418	9.01408	106.387	48.1671	40.3695
miR1425	91.2901	144.496	47.9625	7.56451	21.7718
miR1861e	0.341857	0.78869	0	0	14.2027
miR1861k	0.341857	0.78869	0	0	14.2027
miR1861m	0.341857	0.78869	0	0	14.2027
miR166k	149.905	131.897	2.43569	63.8163	22.093
miR166l	149.905	131.897	2.43569	63.8163	22.093
miR1320	2.61172	20.315	4.30159	6.63771	18.9796
miR1876	28.1021	10.6509	31.6678	9.69061	44.9172
miR1862d	60.3294	27.5213	19.0446	12.9756	22.1725
miR169f	356.436	69.6578	1.06323	0.858676	18.6631
miR169g	356.436	69.6578	1.06323	0.858676	18.6631
miR169n	164.124	39.2213	0.840846	4.41615	10.698
miR169o	164.124	39.2213	0.840846	4.41615	10.698
miR444d.3	90.8363	19.3204	3.53709	5.83368	12.5112
miR820a-5p.2	46.0539	24.4477	13.7628	10.3314	22.5061
miR820b-5p.2	46.0539	24.4477	13.7628	10.3314	22.5061
miR820c-5p.2	46.0539	24.4477	13.7628	10.3314	22.5061
miR820a-3p.1	299.163	34.2017	35.7813	27.2729	20.8598
miR820b-3p.1	299.163	34.2017	35.7813	27.2729	20.8598
miR820c-3p.1	299.163	34.2017	35.7813	27.2729	20.8598
miR444a.2	23.4699	16.5496	3.68313	1.6219	8.3392
miR444d.2	23.4699	16.5496	3.68313	1.6219	8.3392
miR444e	23.4699	16.5496	3.68313	1.6219	8.3392
miR397a	14.5546	2.94551	18.7039	22.0527	13.4326
miR1850.2	114.372	41.9511	2.03961	6.5969	8.09756
miR437-3p.3	40.9616	10.8886	5.5872	6.89673	15.2333
miR1320-3p	15.3698	18.7966	0.840846	3.3939	14.6081
miR820b-3p.3	100.148	26.7224	7.9637	10.0997	10.4985
miR820c-3p.3	100.148	26.7224	7.9637	10.0997	10.4985
miR1849.2	64.4498	19.918	6.11882	3.59828	6.19711
miR393	705.108	29.127	11.9561	5.35643	76.8495
miR393b	705.108	29.127	11.9561	5.35643	76.8495
miR820b-3p.2	88.7876	33.9166	0.531614	0.463401	10.2693
miR820c-3p.2	88.7876	33.9166	0.531614	0.463401	10.2693
miR169h	183.122	23.2831	40.8054	8.80462	10.4611
miR169i	183.122	23.2831	40.8054	8.80462	10.4611
miR169j	183.122	23.2831	40.8054	8.80462	10.4611
miR169k	183.122	23.2831	40.8054	8.80462	10.4611
miR169l	183.122	23.2831	40.8054	8.80462	10.4611
miR169m	183.122	23.2831	40.8054	8.80462	10.4611
miR168a-3p.2	53.2961	23.919	23.6936	13.3705	7.76863
miR395a.2	1.72353	0.852733	1.23693	1.09038	4.69265
miR1878	21.1338	1.73714	2.48437	2.34433	5.90559
miR2871a	24.2706	100.155	1.59484	29.7819	5.70135
miR2871b	24.2706	100.155	1.59484	29.7819	5.70135
miR398a	0.505666	1.48838	4.03053	5.35643	4.68018
miR1856	69.636	8.47398	0	5.53385	4.83454
miR1429-3p.2	159.743	65.1869	3.63445	0.695101	10.3364
miR2878-5p	44.4198	12.1464	0.840846	2.01718	5.0263
miR394	5.11582	3.96034	4.16606	2.99863	2.77973
miR164e	16.6076	4.74172	1.45931	0.395275	2.9715
miR2873	83.0462	13.1488	0.667146	1.25395	3.37997
miR820a-5p.1	17.5267	50.711	2.34884	5.73823	3.78843
miR820b-5p.1	17.5267	50.711	2.34884	5.73823	3.78843
miR820c-5p.1	17.5267	50.711	2.34884	5.73823	3.78843
miR1432	9.58937	42.3374	0.840846	2.60335	5.00136
miR164d	15.5015	13.5031	69.939	19.3266	2.75479
miR1879	7.82752	4.82273	4.21474	2.78041	3.77596
miR319a	0.740673	3.63225	4.47529	1.6219	3.3675
miR319b	0.740673	3.63225	4.47529	1.6219	3.3675
miR160f	32.4461	3.63727	1.99092	1.41753	1.72116
miR1318	22.1983	32.7099	0	1.5811	2.32139
miR2864.2	4.50631	1.21018	0	6.16083	2.32139
miR444f	3.30633	2.35037	0.222382	0	2.32139
miR1423-3p.2	11.904	5.16468	5.8201	2.0853	1.90045
miR1423-5p.2	19.8252	29.1432	1.06323	1.1585	2.92162
miR1429-5p.2	49.9751	19.1533	7.22021	6.66503	1.28775
miR390	25.5457	171.208	47.3518	33.3649	2.51315
miR399d	11.6463	1.45119	1.68169	1.25395	10.0698
miR1427	0	0	0	0	0.866813
miR160a	32.5084	6.67738	5.83724	2.20808	1.27528
miR160b	32.5084	6.67738	5.83724	2.20808	1.27528
miR160c	32.5084	6.67738	5.83724	2.20808	1.27528
miR160d	32.5084	6.67738	5.83724	2.20808	1.27528
miR162b	7.85754	5.70398	14.4299	2.48058	1.27528
miR1857-3p	4.5616	1.55043	0.531614	0	1.68375
miR1861b	1.05809	0.122967	0	0	0.866813
miR1861f	1.05809	0.122967	0	0	0.866813
miR1861i	1.05809	0.122967	0	0	0.866813
miR1861l	1.05809	0.122967	0	0	0.866813
miR1870-p5.1	58.8263	100.839	0.222382	0	3.52185
miR1873.2	12.6322	17.5751	0.531614	1.02225	2.29645
miR1874-5p	0.0613808	0.213963	1.06323	0.463401	1.68375
miR2869	4.32562	2.19855	0.309232	0.395275	0.866813
miR2874	9.74377	12.5498	0.309232	0.626975	1.07105
miR399j	2.71709	0.635651	0.976378	2.20808	4.74725
miR1428e-3p	7.80282	13.0531	3.45024	5.7109	0.65011
miR166m	8.39108	3.12114	0.222382	2.76693	1.05858
miR1846a-3p	0	0	0	0	1.26281
miR1846b-3p	0	0	0	0	1.26281
miR1846d-3p	0.945339	0.589103	0.667146	0.2317	1.05858
miR1861c	0.513622	0.648127	0	0	0.65011
miR1861d	0.096144	0	0	0	0.65011
miR1867.2	5.97136	1.02839	0.531614	0	1.67128
miR1870-p3.1	24.9873	7.52492	0.531614	0.695101	3.10091
miR1870-p5.2	36.2778	15.4056	0.840846	1.1585	1.67128
miR1874-3p	0.683715	1.70235	5.05559	1.48565	3.50938
miR2864.1	5.97528	0.785571	0.222382	0.79055	1.67128
miR169e	1.94076	0.363883	0.667146	0.463401	1.65881
miR172b	0.595526	0.656265	4.77401	4.40231	0.433407
miR1846d-5p	1.37077	0.761636	0	0	0.433407
miR1849.1	3.70239	0.75038	0	0	0.63764
miR1857-5p.1	0.368475	2.20147	0.309232	0.79055	0.63764
miR1861a	0.613808	0.0734004	0.531614	0.2317	2.06728
miR1862a	11.4834	5.56413	2.57122	1.1585	0.841874
miR1862b	11.4834	5.56413	2.57122	1.1585	0.841874
miR1862c	11.4834	5.56413	2.57122	1.1585	0.841874
miR1862e	45.9965	61.4174	1.76854	1.71735	0.841874
miR1868.1	7.93884	7.15109	0.753996	0	1.25034
miR2863b	1.11101	0.284244	0	0.395275	0.63764
miR2870	2.30128	0.504446	0.309232	0	2.27151
miR2872	1.65586	7.09509	0	0.395275	1.45457
miR396g	5.69569	1.5649	0	0	0.433407
miR396h	5.69569	1.5649	0	0	0.433407
miR396i	5.69569	1.5649	0	0	0.433407
miR397b	0	0	0	0	0.841874
miR531	0	0	1.28561	0.2317	0.841874
miR1317-5p.1	26.3425	6.72609	0	0.395275	0.216703
miR1428e-5p	1.21786	0.753499	0	0	0.216703
miR1431	5.1527	3.14028	0	0	0.216703
miR164c	3.21097	0.557132	13.4325	4.49776	1.23787
miR166i	0.491237	0.357544	1.15008	0.2317	0.420937
miR166j	0.491237	0.357544	1.15008	0.2317	0.420937
miR172c	1.00262	1.49592	3.45024	1.09038	0.216703
miR1863b	5.73685	2.05375	0	0.79055	1.23787
miR1873	32.13	18.4826	0	2.37165	2.25904
miR2876.2	3.90636	1.39227	0	0	1.03364
miR2877.2	1.64958	2.06311	1.19876	0	0.420937
miR395c	0.0819045	0.410331	0.309232	0	0.625171
miR395f	0	0	0	0	0.216703
miR395o	0.0819045	0.410331	0.309232	0	0.625171
miR437-5p	5.78291	3.74346	0.889527	0.395275	1.4421
miR440	18.1999	8.21689	0	1.97638	1.03364
miR530-5p	0.096144	0	7.98472	0.463401	0.420937
miR1317-3p	143.27	30.3983	0	0.79055	0.612701
miR1317-5p.2	47.0867	13.4821	0.753996	3.78918	0.204234
miR1423-3p.1	0.178048	0.363883	0	0	0
miR1423-5p.1	7.68703	7.31851	0	0.395275	0
miR1423b	7.68703	7.31851	0	0.395275	0
miR1424	0	0	0	0	0
miR1426	0	0	0	0	0
miR1428a-3p	0	0.146801	0	0	0
miR1428a-5p	0	0.210844	0	0	0
miR1428b-3p	0	0	0	0	0
miR1428c-3p	0	0	0	0	0
miR1428d-3p	0	0	0	0	0
miR1429-3p.1	0.096144	0.126086	0.222382	0.2317	0
miR1429-5p.1	0	0.210844	0	0.2317	0
miR1430	0	0	0	0	0
miR1433	0.567047	1.37277	1.42114	0.2317	0
miR1435	0	0	0	0	0
miR156k	0	0	0	0	0
miR156l	0	0.0734004	0	0	0
miR159c	0	0	0	0	0
miR159d	0	0	0	0	0
miR159e	0	0	0	0	0
miR159f	0.096144	0.0702813	3.32522	1.55378	0
miR160e	24.5254	6.71941	4.37793	2.01718	0.816934
miR166e	2.36133	1.32992	0.309232	0.395275	0.204234
miR168b	0	0	0	0	0
miR169d	0	0	0.309232	0	0
miR169p	0	0	0	0	0
miR169q	0	0	0	0	0
miR171a	0.163809	0.782452	21.6291	2.317	0
miR171g	0	0	0	0	0
miR171h	0	0	0	0	0
miR171i	0	0.0734004	0	0	0
miR1846a-5p	0.157525	0.281025	0.222382	0	0.204234
miR1846b-5p	0.157525	0.281025	0.222382	0	0.204234
miR1846c-3p	0	0	0	0	0
miR1846c-5p	0.157525	0.281025	0.222382	0	0.204234
miR1848	0.288432	0.0526858	0.753996	0	0
miR1851	0.914999	0.806185	0	0	0
miR1852	0	0.0526858	0	0	0
miR1853-3p	0	0	0	0	0
miR1853-5p	0	0	0	0	0
miR1854-3p	0	0	0	0	0
miR1854-5p	0	0	0	0	0
miR1855	0	0	0	0	0
miR1857-5p.2	0.941806	2.16204	0.618464	0	0.204234
miR1858a	0	0	0	0	0
miR1858b	0	0	0	0	0
miR1859	3.78329	4.47832	0.753996	4.3207	0
miR1860-3p	0.876003	2.99738	0	0.2317	0.204234
miR1860-5p	0.178048	1.24859	0	0	0
miR1861g	0	0	0	0	0
miR1861h	6.45907	1.50568	0	0	0.408467
miR1861j	6.45907	1.50568	0	0	0.408467
miR1861n	1.18676	0.649926	0	0	0
miR1864	5.45859	1.78026	0	0	0
miR1865-3p	0.779669	0.407212	0	0	0
miR1865-5p	2.95724	2.68528	0.222382	0	0
miR1866	0	0	0	0	0
miR1869	0.122762	0	0	0	0
miR1872	0.341667	0	0	0	0
miR1875	0.765429	0.105372	0	0	0.204234
miR1877	0	0	0	0	0
miR1880	0.519716	0.981838	0	0	0
miR1881	0	0	1.95276	0.695101	0
miR1882a	47.0867	13.4821	0.753996	3.78918	0.204234
miR1882b	47.0867	13.4821	0.753996	3.78918	0.204234
miR1882c	47.0867	13.4821	0.753996	3.78918	0.204234
miR1882d	47.0867	13.4821	0.753996	3.78918	0.204234
miR1882e	47.0867	13.4821	0.753996	3.78918	0.204234
miR1882f	47.0867	13.4821	0.753996	3.78918	0.204234
miR1882g	47.0867	13.4821	0.753996	3.78918	0.204234
miR1882h	47.0867	13.4821	0.753996	3.78918	0.204234
miR1883a	12.2593	7.95922	0	1.64923	0.612701
miR1883b	12.2593	7.95922	0	1.64923	0.612701
miR1884a	1.32196	0.287364	0	0.395275	0.408467
miR2862	0.245523	0.0734004	0	0	0.204234
miR2863a	0.096144	0.363883	0	0.395275	0
miR2865	1.09677	0.0526858	0	0.395275	0
miR2866	0.096144	0	0	0	0
miR2867	0	0	0	0	0
miR2868	0	0	0	0	0
miR2875	2.26838	0.841376	0	0	0
miR2876.1	0.192288	0.0734004	0	0	0
miR2877.1	0.096144	0.143682	0	0.395275	0
miR2878-3p	3.96696	7.80506	0	0	0.204234
miR2879	0.765619	0.360764	0.531614	0	0
miR2880	0.900759	0.659283	0.618464	0	0
miR2905	3.30692	0.723226	0	1.18583	0.204234
miR395a	0	0	0	0	0
miR395t	0	0	0	0	0
miR395u	0	0	0	0	0
miR395v	0	0	0	0	0
miR395w	0	0	0	0	0
miR399a	0.096144	0.220201	0	0	0
miR399b	0.096144	0.220201	0	0	0
miR399c	0.096144	0.220201	0	0	0
miR399e	0	0	0	0	0.204234
miR399f	0	0	0	0	0.204234
miR399g	0	0	0	0	0.204234
miR399h	0	0	0	0	0
miR399i	0	0	0	0	0
miR399k	0	0	0	0	0
miR437-3p.1	0.0819045	0.293602	0	0	0
miR438	0	0	0	0	0
miR444a.1	0.280286	0	0	0	0
miR444d.1	0.280286	0	0	0	0
miR529a	0	0	0	0	0
miR529b	1.51662	6.35404	0.222382	0	0
miR531b	0	0	6.44907	0	0.204234
miR827	0	0	0	0	0
aAverage RPMs calculated from the datasets described in Table S2

## Sheet: Supplementary file 1D
Supplementary file 1D.Oligonucleotides used in this study
Oligonucleotides	Sequence (5’-3’)
Primers used for quantitative RT-PCR
OsAGO1a-F	TTGGTCTCGCAATGCTGTCT
OsAGO1a-R	TCGTTGGCCTATCACTCACA
OsAGO1b-F	GTCCAGAAGCGGCATCACAC
OsAGO1b-R	TAATGAGCAGGACGGCTTGTTC
OsAGO1c-F	TAGCCATGCTGGCATTAAGG
OsAGO1c-R	GAAGGCAGCCAGATGAGCATAA
OsAGO1d-F	CGCCACCACACGAGATTATT
OsAGO1d-R	GCATGGCTGCACAAGAAGAA
OsAGO18-F	TGTTCGTCCAGGCACAGTAG
OsAGO18-R	GCGGTGAAGTTGTTGTCGTC
OsEF-1a-F	GCACGCTCTTCTTGCTTTCACTCT
OsEF-1a-R	AAAGGTCACCACCATACCAGGCTT
Probes used for small RNA northern blots
miR168	GTCCCGATCTGCACCAAGCGA
miR166	GGGGAATGAAGCCTGGTCCGA
miR444	TGCAGTTGCCACCTCTAGC
miR156	GTGCTCACTCTCTTCTGTCA
vsiRNA-1	TCCACGGAGAATCTCGTCTTCAGCA
	ATGGCATTACTCCTTTTCAATGAT
vsiRNA-2	CATGGGATGCTGTGAGGAGTTCAC
	AGATCCAGCTCTTAGAGCACATGCT
vsiRNA-3	GCTCGCCATCCGGATGTGGTGCGTA
	GCACCATTTCGAGGATATAAGATT
vsiRNA-4	TGCTGAAGACGAGATTCTCCGTGGAC
	GATTTCTGTTAGATTTATATGA
U6	TTCCCGATCGGTCACCCATCCCAAAATTGCT
	CCAAGCCAAGCACGCTTAACCTAAGAGTTCT
Primers used for generating riboprobes
RSV-RNA1-F	GCACCCAATAGGTATCTCCTTGAT
RSV-RNA1-R	CAAATGACCCTACTAGATGGACGA
RSV-RNA2-F	CAACCACCCTTATCACAAACTTCA
RSV-RNA2-R	CACCAATACCTTTCCCTGACACCC
RSV-RNA3-F	TATATGGGCACCAACAAGCCAGCC
RSV-RNA3-R	TATGACTTAGGGAGTGAGTTGTGCAGT
RSV-RNA4-F	GCTTCACCACACCGAACTCCTTCT
RSV-RNA4-R	GTTACGATTG ACCAAGCTGCCACA
RDVS2-F	CCGGGACGTGCCAAACCGTGAAC
RDVS2-R	ACGCCATCAACAGAGCAGAATCCATTA
RDVS8-F	TCAATAGCGATACCAAGCCTACCGTTTC
RDVS8-R	ATCGATGTCGGGGTCTGAGTTATCGAGTTCAAT
RDVS11-F	CATGCCATGGCAATGAGTGGAACATTACCCTTG
RDVS11-R	AGAATGCGGCCGCTTACTTACGCTTTGATTTGCGAG
AGO1a-T7Slicer-F:	ATATAATACGACTCACTATAGGG AGTGGTGGACATGGAGTT
AGO1a-Slicer-R	TGATGTTGGACTTCTTCGCT
Primers used for identification of ago18 mutant
LP	GATCGAGGGAACTCGACAAG
RP	CAAGATCAACTCCACGCAAA
LB	AGGTTGCAAGTTAGTTAAGA
Primers used for cloning
AGO18promoter-Kpn1-F	ATAGGTACCTGCAAAACTCTAAGCCACAGAGCT
AGO18promoter-Pst1-R	ATACTGCAGTCCGATCGACGGCCGCCGCTG
AGO18promoter-HindIII-F	ATAAAGCTTTGCAAAACTCTAAGCCACAGAGCT
AGO18promoter-Kpn1-F	ATAGGTACCTCCGATCGACGGCCGCCGCTG
AGO18cds-Sma 1-F	ATACCCGGGATGGCGAGCCGAGGAGGAGGC
AGO18cds-Sma 1-myc-F	ATACCCGGGATGGAGCAGAAGCTGATCTCA
	GAGGAGGACCTGATGGCGAGCGAGGAGGAGGC
AGO18cds-Sal 1-R	GACGTCGACCTAGCAAAAGAACATGGACTTTTTC
AGO1acds-Xba1-flag-F:	ATATCTAGAATGGACTATAAAGACGATGA
	TGACAAAATGGCCTTCCAGTTGGACAAC
AGO1acds-Sal 1-R:	ATAGTCGACTTAGCAGTAGAACATGACACGTTT
AGO1bcds-BamH1-flag-F	ATAGGATCCATGGACTATAAAGACGATGA
	TGACAAAATGGCGCTGCAGTTGGAGAAT
AGO1bcds-Sal 1-R	ATAGTCGACTTAGCAGTAAAACATGACACGCTTCAC
AGO1bcds-geatway-flag-F	CACCATGGACTATAAAGACGATGA
	TGACAAAATGGCGCTGCAGTTGGAGAAT
AGO1bcds-geatway-R	TTAGCAGTAAAACATGACACGCTTCAC
AGO18-YF/AA-F	CAAGACTGTCAAGGAGGCTGCTAACAAAAAATACAATCT
AGO18-YF/AA-R	GATTGTATTTTTTGTTAGCAGCCTCCTTGACAGTCTTG
AGO18-D833A-F	ACTATTATATTTGGTGCTGCTGTTACCCATCCTGGGTCC
AGO18-D833A-R	CCCAGGATGGGTAACAGCAGCACCAAATATAATAGTTG
AGO18cds-geatway-Flag-F	CACCATGGATTACAAGGATGACGACGAT
	AAGATGGCGAGCCGAGGAGGAGGC
AGO18cds-geatway-R	CTAGCAAAAGAACATGGACTTTTTC
Actin-RT-F	CTTCGTCTCGACCTTGCTGGG
Actin-RT-R	GAGAAACAAGCAGGAGGACGG
miR168-prce-BamH l-F	GGATCCCCCTGGATGGCAAGTTCCTG
miR168-prce-Pst l-R	ATACTGCAGCAGGGACGTGGTGGACGTTAC
MiR444prce-BamH l-F:	ATAGGATCCAAACTCGTTGTCGTCGTCCCGT
MiR444prce-Pst l-R:	ATACTGCAGGGAAAGCTCATACTAATGTTG
AGO1aPromoter-HindIII-F	ATAAAGCTTGAGTAGTAGTAGGAGTGGGCG
AGO1aPromoter-Kpn1-R	ATAGGTACCCGACACCGCGGTCAAAG
AGO1a-EcoR1-Flag-F	CACCGAATTCATGGACTATAAAGACGATGATGAC
	AAAATGGCCTTCCAGTTGGACAAC
AGO1a-EcoR1-F	CACCGAATTCATGGCCTTCCAGTTGGACAACGGG
AGO1a-R	TTA GCA GTA GAA CAT GAC ACG TTT GAC
AGO1a-168Res-F	GAACAGtcccagaacttcatcaggcTTCACAAGACCAGTACCAAG
AGO1a-168Res-R	GTCTTGTGAAgcctgatgaagttcagggaCTGTTCTTGATGGACTG
